# Supplementary material for: Efficient removal of uranium(vi) from simulated seawater using amidoximated polyacrylonitrile/FeOOH composites
Source: Royal Society of Chemistry journal article supplement (doi:10.1039/c7dt02164j), 2017-01-01
Supplement: c7dt02164j1.pdf [file c7dt02164j1.pdf]

*Electronic Supplementary Information for*

Efficient removal of uranium(VI) from simulated seawater using  
amidoximated polyacrylonitrile/FeOOH composites

*Xintao Wei<sup>a</sup>, Qi Liu<sup>a,b,c\*</sup>, Hongsen Zhang<sup>a</sup>, Zetong Lu<sup>d</sup>, Jingyuan Liu<sup>a,c</sup>, Rongrong*

*Chen<sup>a,c</sup>, Rumin Li<sup>a,b,c\*</sup>, Zhangshuang Li<sup>a,c</sup>, Peili Liu<sup>c</sup> and Jun Wang<sup>a,c</sup>*

<sup>a</sup> *Key Laboratory of Superlight Material and Surface Technology, Ministry of Education, Harbin Engineering University, 150001, P. R. China.*

<sup>b</sup> *Harbin Ship Engineering Research & Design Institute Co., Ltd, Harbin, China.*

<sup>c</sup> *College of Material Science and Chemical Engineering, Harbin Engineering University, 150001, P. R. China.*

<sup>d</sup> *Heilongjiang University of Science and Technology, 150027, P. R. China.*

\* Corresponding author: Tel.: +86 451 8253 3026; fax: +86 451 8253 3026.

E-mail address: qiliu@hrbeu.edu.cn

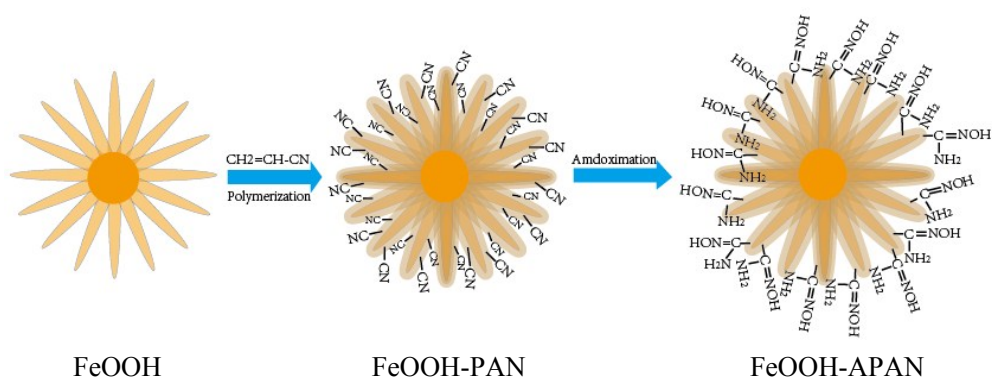

Fig. S1 Synthesis of amidoximated polyacrylonitrile/FeOOH composites.

Table S1: Main element contents on the FeOOH-APAN-U calculated from SEM-EDS (%).

| Element | C    | N    | O    | Fe  | U   | Totals |
|---------|------|------|------|-----|-----|--------|
| Weight  | 45.1 | 39.7 | 12.5 | 0.8 | 2.0 | 100    |

Table S2: Adsorption Isotherm Data of FeOOH-APAN towards U(VI)

| T(K)  | $C_0(\text{mg L}^{-1})$ | $C_e(\text{mg L}^{-1})$ | $Q_e(\text{mg g}^{-1})$ | Removal(%)        | $K_d(\text{mL g}^{-1})$ |
|-------|-------------------------|-------------------------|-------------------------|-------------------|-------------------------|
| 298   | 25.98                   | 0.332                   | 64.12                   | 98.72             | $1.93 \times 10^5$      |
|       | 52.81                   | 0.804                   | 130.015                 | 98.48             | $1.62 \times 10^5$      |
|       | 105.8                   | 1.796                   | 260.01                  | 98.30             | $1.45 \times 10^5$      |
|       | 152.4                   | 2.838                   | 373.905                 | 98.14             | $1.32 \times 10^5$      |
|       | 206                     | 3.875                   | 505.3125                | 98.12             | $1.30 \times 10^5$      |
|       | 256.3                   | 4.87                    | 628.575                 | 98.10             | $1.29 \times 10^5$      |
|       | 308.8                   | 7.623                   | 752.9425                | 97.53             | $9.88 \times 10^4$      |
|       | 384.2                   | 38.5                    | 864.25                  | 89.98             | $2.24 \times 10^4$      |
|       | 440                     | 78.57                   | 903.575                 | 82.14             | $1.15 \times 10^4$      |
|       | 510.6                   | 126.7                   | 959.75                  | 75.19             | $7.6 \times 10^3$       |
|       | 609.2                   | 224.2                   | 962.5                   | 63.20             | $4.3 \times 10^3$       |
| 654.1 | 268.7                   | 963.5                   | 58.92                   | $3.6 \times 10^3$ |                         |
| 308   | 25.98                   | 0.071                   | 64.7725                 | 99.73             | $9.12 \times 10^5$      |
|       | 52.81                   | 0.678                   | 130.33                  | 98.72             | $1.92 \times 10^5$      |
|       | 105.8                   | 1.467                   | 260.8325                | 98.61             | $1.78 \times 10^5$      |
|       | 152.4                   | 2.314                   | 375.215                 | 98.48             | $1.62 \times 10^5$      |
|       | 206                     | 3.562                   | 506.095                 | 98.27             | $1.42 \times 10^5$      |
|       | 256.3                   | 4.615                   | 629.2125                | 98.20             | $1.36 \times 10^5$      |
|       | 308.8                   | 5.983                   | 757.0425                | 98.06             | $1.27 \times 10^5$      |
|       | 384.2                   | 14.18                   | 925.05                  | 96.31             | $6.52 \times 10^4$      |
|       | 440                     | 35.69                   | 1010.775                | 91.89             | $2.83 \times 10^4$      |
|       | 510.6                   | 75.49                   | 1087.775                | 85.22             | $1.44 \times 10^4$      |
|       | 609.2                   | 173.9                   | 1088.25                 | 71.45             | $6.3 \times 10^3$       |
| 654.1 | 218.5                   | 1089                    | 66.60                   | $5.0 \times 10^3$ |                         |
| 318   | 25.98                   | 0.0556                  | 64.811                  | 99.79             | $1.17 \times 10^6$      |

|       |       |          |       |                    |
|-------|-------|----------|-------|--------------------|
| 52.81 | 0.453 | 130.8925 | 99.14 | $2.89 \times 10^5$ |
| 105.8 | 1.09  | 261.775  | 98.97 | $2.40 \times 10^5$ |
| 152.4 | 1.767 | 376.5825 | 98.84 | $2.13 \times 10^5$ |
| 206   | 2.449 | 508.8775 | 98.81 | $2.08 \times 10^5$ |
| 256.3 | 3.641 | 631.6475 | 98.58 | $1.73 \times 10^5$ |
| 308.8 | 4.775 | 760.0625 | 98.45 | $1.59 \times 10^5$ |
| 384.2 | 9.336 | 937.16   | 97.57 | $1.00 \times 10^5$ |
| 440   | 24.72 | 1038.2   | 94.38 | $4.20 \times 10^4$ |
| 510.6 | 55.66 | 1137.35  | 89.10 | $2.04 \times 10^4$ |
| 609.2 | 153.9 | 1138.25  | 74.74 | $7.4 \times 10^3$  |
| 654.1 | 198.6 | 1138.75  | 69.64 | $5.7 \times 10^3$  |

Table S3 Comparison of uranium adsorption capacity at different pH

| Adsorbents                                     | $q_e$<br>( $\text{mg g}^{-1}$ ) | $C_0$<br>( $\text{mg L}^{-1}$ ) | $m/V$<br>( $\text{g L}^{-1}$ ) | pH   | Refs |
|------------------------------------------------|---------------------------------|---------------------------------|--------------------------------|------|------|
| Amidoximated polyacrylonitrile/FeOOH composite | 123.8                           | 440                             | 0.4                            | 3.0  |      |
|                                                | 198.3                           | 440                             | 0.4                            | 4.0  |      |
|                                                | 264.6                           | 440                             | 0.4                            | 5.0  |      |
|                                                | 460.7                           | 440                             | 0.4                            | 6.0  | This |
|                                                | 834.1                           | 440                             | 0.4                            | 7.0  | work |
|                                                | 773.2                           | 440                             | 0.4                            | 9.0  |      |
|                                                | 330.8                           | 440                             | 0.4                            | 10.0 |      |
|                                                | 179.5                           | 440                             | 0.4                            | 11.0 |      |

Table S4 Comparison of different adsorbents

| Adsorbents                            | $q_e$<br>( $\text{mg g}^{-1}$ ) | $C_0$<br>( $\text{mg L}^{-1}$ ) | $m/V$<br>( $\text{g L}^{-1}$ ) | pH  | Adsorbates  | Refs      |
|---------------------------------------|---------------------------------|---------------------------------|--------------------------------|-----|-------------|-----------|
| $\text{Fe}_3\text{O}_4$ @Polydopamine | 4                               | 5                               | 5                              | /   | Rhodamine B | 24        |
| CMNP@PmPD                             | 95.2                            | 139.5                           | 0.1                            | 2.3 | As(V)       | 43        |
| PANI/H-TNBs                           | 339.46                          | 251.8                           | 0.3                            | 5.0 | HA          | 44        |
|                                       | 156.94                          | 137.1                           | 0.3                            | 5.0 | Cr(VI)      |           |
| Porous $\text{Fe}_3\text{O}_4$        | 6.77                            | 14                              | 0.5                            | 5.0 | As(III)     | 50        |
|                                       | 7.23                            | 5.1                             | 0.5                            | 5.0 | As(V)       |           |
| $\text{Fe}_3\text{O}_4$ @PmPDs        | 246.09                          | 263                             | 0.5                            | 2.0 | Cr(VI)      | 51        |
| FeOOH-APAN                            | 963.4                           | 440                             | 0.4                            | 8.0 | U(VI)       | This work |

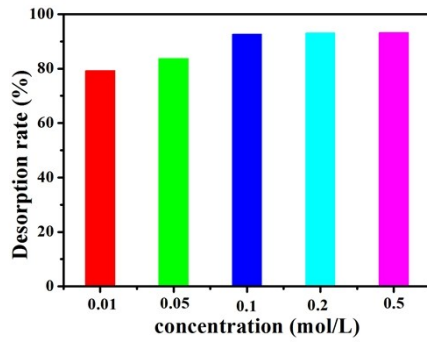

Fig. S2 Effect of hydrochloric acid concentration on desorption, 1-0.01mol/L hydrochloric acid, 2-0.05mol/L hydrochloric acid, 3-0.1mol/L hydrochloric acid, 4-0.2mol/L hydrochloric acid, 5-0.5mol/L hydrochloric acid.

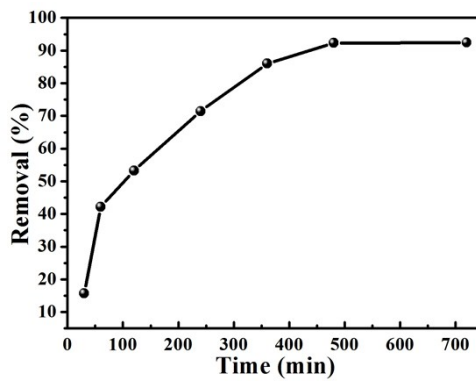

Fig. S3 Effect of contact time on the adsorption of uranium onto FeOOH-APAN( $C_0=3.593$  ppb,  $T=298$  K,  $m=50$  mg,  $V=50$  mL ).
